# Supplementary material for: First Discovery of Beta-Sitosterol as a Novel Antiviral Agent against White Spot Syndrome Virus
Source: MDPI journal article supplement (doi:10.3390/ijms231810448), 2022-09-09

**Table S1.** Specific information on medicinal plants used in this study, including plant names, medicinal parts, extracting solvents, safe concentrations, experimental concentrations.

| Plants                                  | Parts           | Solvent  | Safe con. (mg/kg) | Experimental con. (mg/kg) |
|-----------------------------------------|-----------------|----------|-------------------|---------------------------|
| <i>Alpinia officinarum</i> Hance        | Rhizome         | Methanol | >150              | 100                       |
| <i>Amomum villosum</i> Lour.            | Fruit           | Methanol | >150              | 100                       |
| <i>Chelidonium majus</i> Linn.          | Herb            | Methanol | >150              | 100                       |
| <i>Fibraurea recisa</i> Pierre          | Stem and leaves | Methanol | >150              | 100                       |
| <i>Iris dichotoma</i> Pall.             | Herb and roots  | Methanol | >150              | 100                       |
| <i>Leonurus japonicus</i> Houttuyn      | Herb            | Methanol | >80               | 50                        |
| <i>Linum usitatissimum</i> Linn.        | Seeds           | Methanol | >200              | 100                       |
| <i>Litsea mollis</i> Hemsl.             | Fruit and roots | Methanol | >150              | 100                       |
| <i>Oxalis corniculata</i> Linn.         | Herb            | Methanol | >200              | 100                       |
| <i>Paederia foetida</i> Linn.           | Herb and roots  | Methanol | >150              | 100                       |
| <i>Pinellia ternata</i> (Thunb.) Breit. | Tubers          | Methanol | >150              | 100                       |
| <i>Solanum nigrum</i> Linne.            | Herb            | Methanol | >80               | 50                        |
| <i>Humulus scandens</i> (Lour.) Merr.   | Herb            | Methanol | >150              | 100                       |
| <i>Urtica fissa</i> E. Pritz.           | Leaves          | Methanol | >150              | 100                       |
| <i>Xanthium strumarium</i> Linne.       | Fruit           | Methanol | >80               | 50                        |

**Figure S1.** Six crayfish were randomly selected for PCR detection (VP28, 141 bp), and the WSSV virus solution was used as a positive control. The results showed that these crayfish were in normal state.

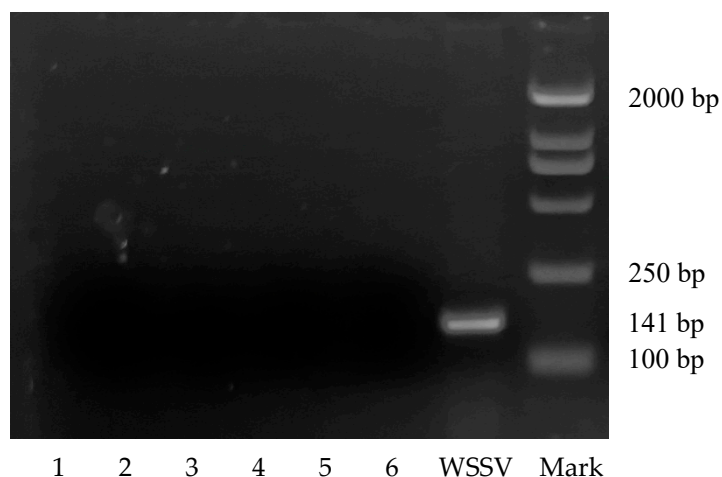

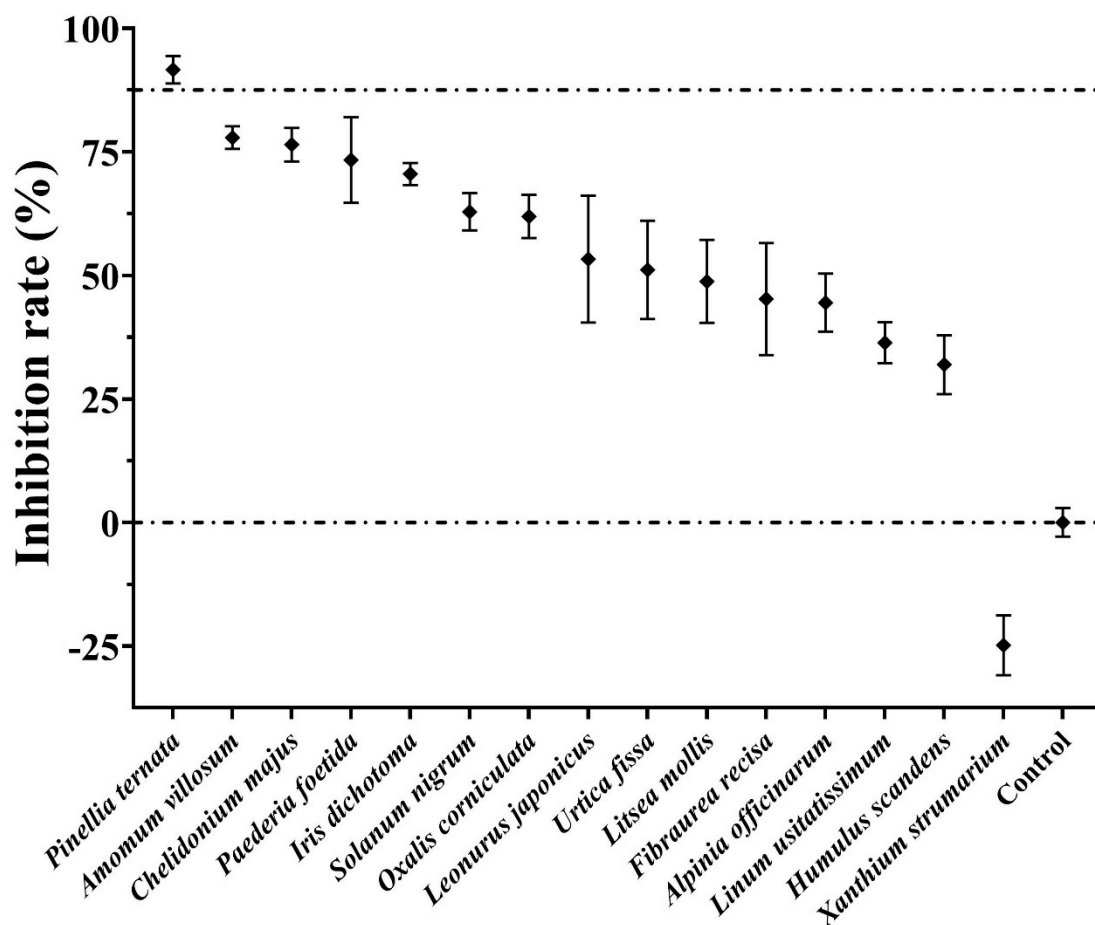

**Figure S2.** The inhibition rates of 15 different Chinese herbal extracts against WSSV were evaluated in vivo (100 mg/kg, 24hpi). The calculation formula was: inhibition rate = (control group - treatment group) / control group \* 100 %. The data was shown as Mean  $\pm$  SD (n=5).

**Figure S3.** The schematic depicting the experimental procedures in Figures 1 and 2.

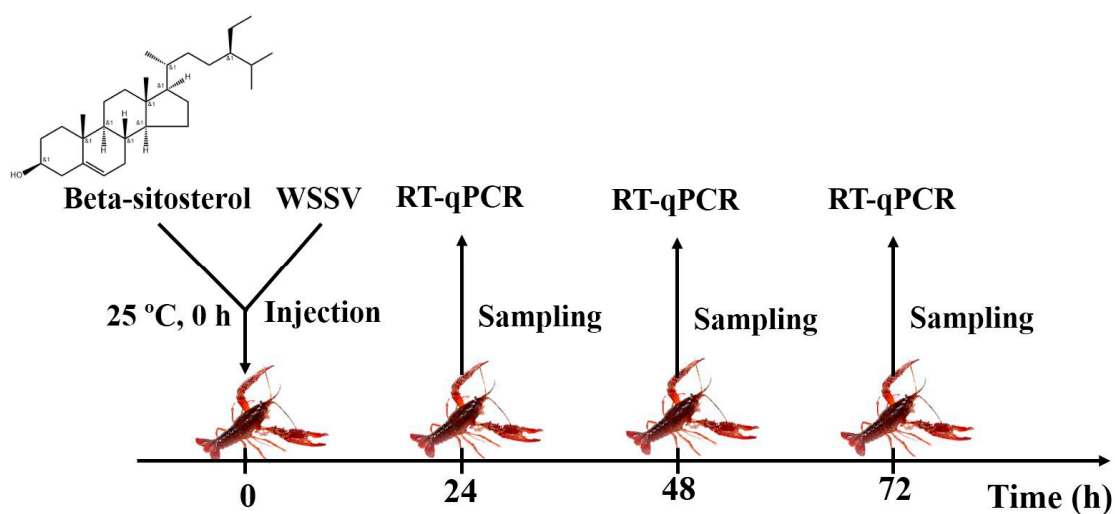

Supplement: s1 [file s1]
